# Supplementary material for: Identification of novel inhibitors of DDR1 against idiopathic pulmonary fibrosis by integrative transcriptome meta-analysis, computational and experimental screening
Source: Royal Society of Chemistry journal article supplement (doi:10.1039/c5mb00911a), 2016-02-25
Supplement: c5mb00911a1.pdf [file c5mb00911a1.pdf]

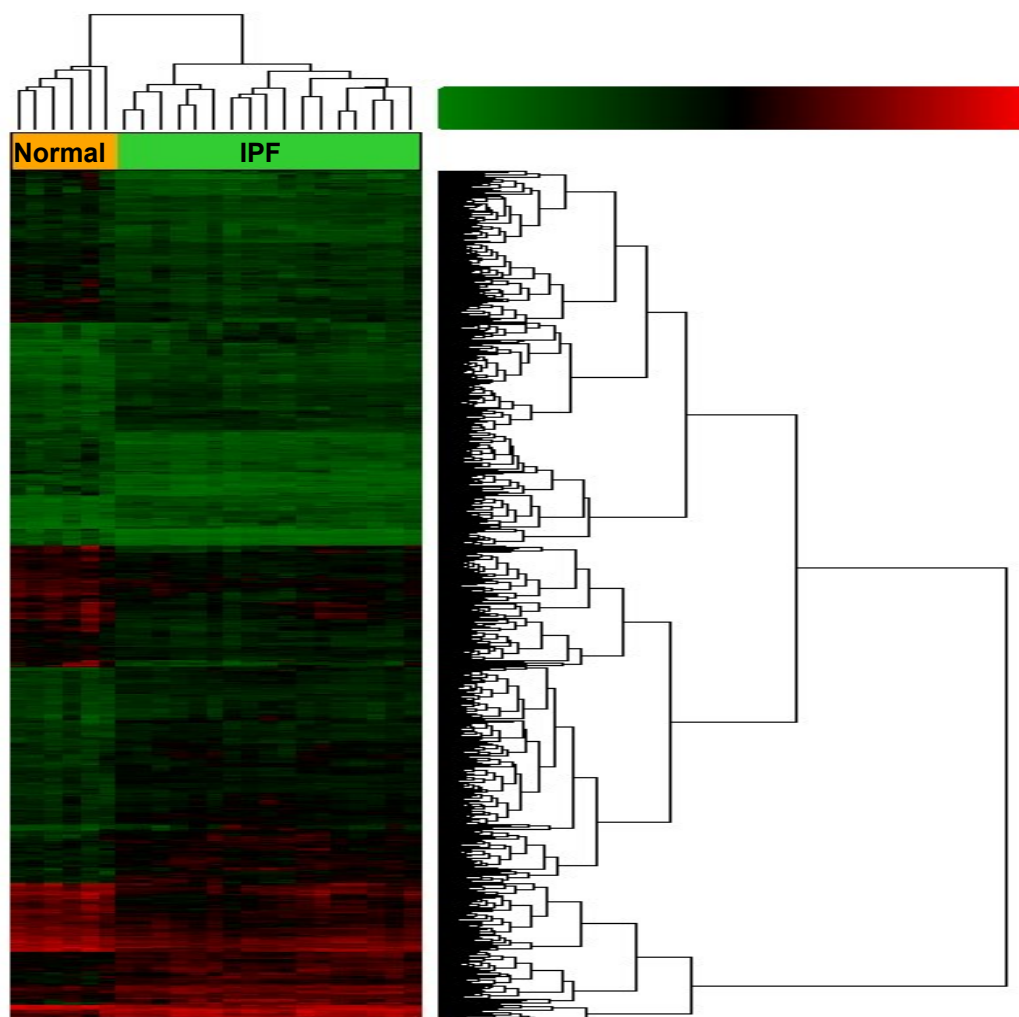

**Figure S1** Hierarchical Cluster analysis of four IPF datasets.

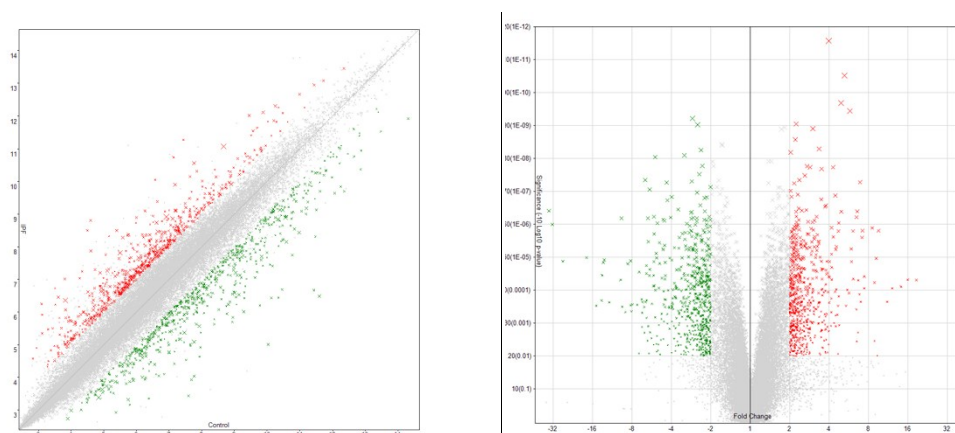

**Figure S2** Scatter plot and Volcano plot of differential expression genes.

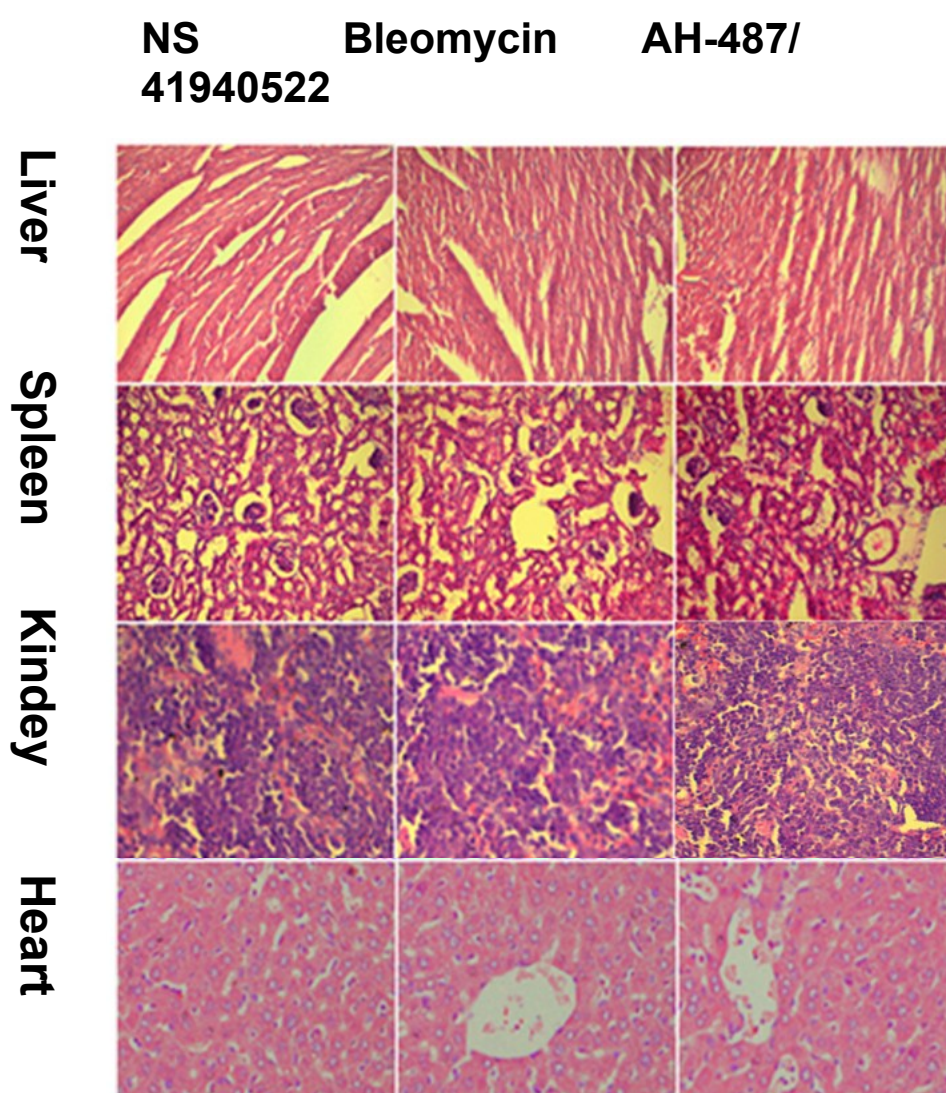

**Figure S3** H&E staining histopathogenic sections of main organs.
